# Supplementary material for: Enhancing prosthetic vision by upgrade of a subretinal photovoltaic implant in situ
Source: Springer Nature journal article supplement (doi:10.1038/s41467-025-58084-y), 2025-03-21

# Supplementary figures for:

## **Enhancing Prosthetic Vision by Upgrade of a Subretinal Photovoltaic Implant in situ**

Mohajeet B. Bhuckory<sup>1,2,@</sup>, Nicharee Monkongpitukkul<sup>2,3,\*</sup>, Andrew Shin<sup>4,\*</sup>, Anna Kochnev Goldstein<sup>5</sup>, Nathan Jensen<sup>5</sup>, Sarthak V Shah<sup>2</sup>, Davis Pham-Howard<sup>1,2</sup>, Emma Butt<sup>6</sup>, Roopa Dalal<sup>2</sup>, Ludwig Galambos<sup>1</sup>, Keith Mathieson<sup>6</sup>, Theodore Kamins<sup>5</sup>, and Daniel Palanker<sup>1,2</sup>

<sup>1</sup> Hansen Experimental Physics Laboratory, Stanford University, Stanford, CA 94303, USA

<sup>2</sup> Department of Ophthalmology, Stanford University, Stanford, CA, USA

<sup>3</sup> Department of Ophthalmology, Faculty of Medicine, Prince of Songkla University, Thailand

<sup>4</sup> Department of Material Science, Stanford University, Stanford, CA, USA

<sup>5</sup> Department of Electrical Engineering, Stanford University, Stanford, CA, USA

<sup>6</sup> Department of Physics, University of Strathclyde, Glasgow, Scotland, UK

\*Contributed equally

@ Corresponding author – Mohajeet B Bhuckory; 300 Pasteur drive, Dept of Ophthalmology, Stanford university, CA 94303, USA; bhuckory@stanford.edu



**Supplementary Figure. 2.** Toluidine blue stained histological section 6 weeks post-explantation (n=3). A thick acellular layer (yellow arrow) develops in the subretinal space (red dotted line marks the RPE/choroid boundary). The subretinal fibrosis is localized to the area where the implant was (yellow dotted lines mark the location of primary implant). Scale bar 150  $\mu\text{m}$ .

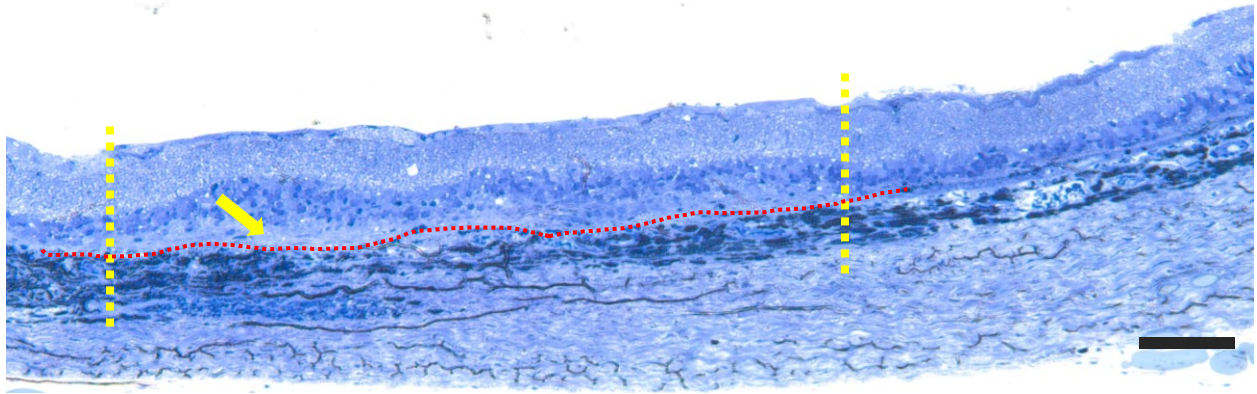

**Supplementary Figure. 3.** OCT image of an RCS control retina before surgery (n= 12). The lens occupies the majority of the anterior chamber, leaving approximately 1 mm of space for retinal detachment, tool insertion and subretinal manipulations.

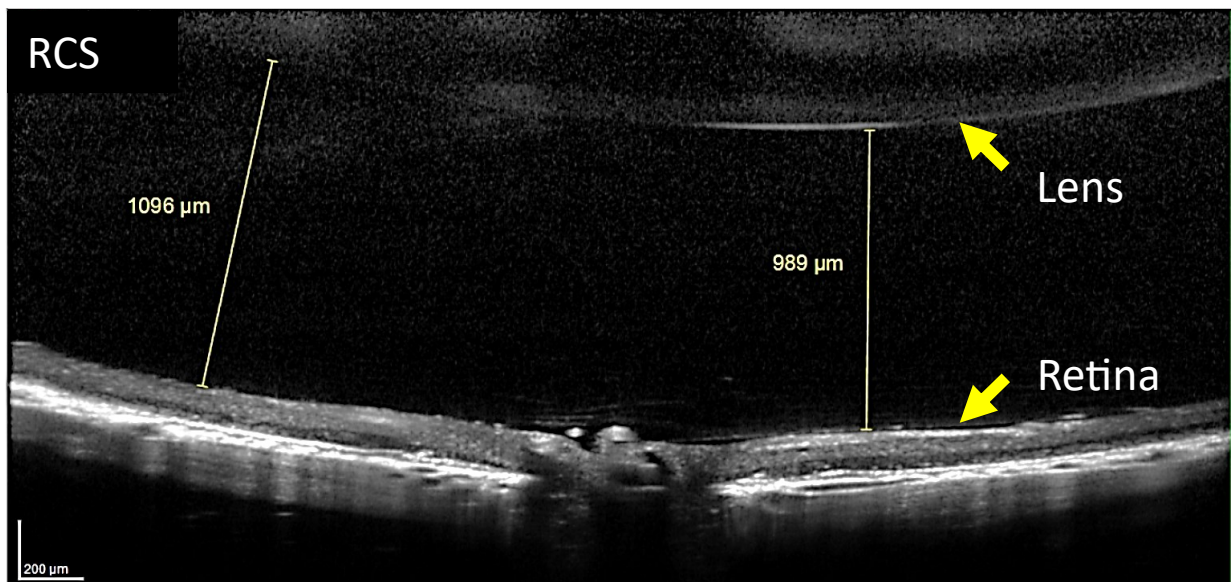

Supplement: MOESM1 [file 41467_2025_58084_MOESM1_ESM.pdf]
